# Supplementary material for: Vegetation Pattern and Regeneration Dynamics of the Progressively Declining Monotheca buxifolia Forests in Pakistan: Implications for Conservation
Source: MDPI journal article supplement (doi:10.3390/su14106111), 2022-05-18
Supplement: s1 [file s1]

**Table S1.** A brief detail of the documented woody tree species.

| Tree Species                   | AC                        | CU   | LN        | Family        | TT      | LF | LS | CH           |
|--------------------------------|---------------------------|------|-----------|---------------|---------|----|----|--------------|
| <i>Acacia modesta</i>          | (Linn.) Wall.             | Acmo | Palosa    | Mimosaceae    | BLD, AD | MP | L  | SU,SS, IT    |
| <i>Acacia nilotica</i>         | (Linn.) Delile            | Acni | Kikar     | Mimosaceae    | BLD, AD | MP | L  | IT, SU, SS   |
| <i>Ailanthus altissima</i>     | (Mill). Swingle           | Aial | Baykanrra | Simaroubaceae | BLD, AD | MP | Mi | Circ, EA     |
| <i>Albezzia lebeck</i>         | (L.) Benth.               | Alle | Srris     | Mimosaceae    | BLE, AD | MP | L  | ES, Trop, IT |
| <i>Broussonetia papyrifera</i> | L. Hertit. Ex vent.       | Brpa | Gul Toot  | Moraceae      | BLD, AD | MP | Me | EA, ITL, GR  |
| <i>Capparis decidua</i>        | Linn.                     | Cade | Kirra     | Capparidaceae | BLD, AD | NP | Ap | SA, SU       |
| <i>Celtis australis</i>        | Decne.                    | Ceeu | Taghage   | Ulmaceae      | BLD, AD | MP | Me | PLU          |
| <i>Dalbergia sissoo</i>        | DC. Roxb.                 | Dasi | Shisham   | Papilionaceae | BLE, AD | MP | Mi | IGB          |
| <i>Eucalyptus globulus</i>     | Labill.                   | Eugl | Lache     | Myrtaceae     | BLE, AD | MP | Mi | PLU          |
| <i>Ficus palmata</i>           | Forssk.                   | Fipa | Enzar     | Moraceae      | BLD, AD | MP | Me | IT, M, ES    |
| <i>Grewia optiva</i>           | J. R. Drumm.ex<br>Burret. | Grop | Pastawane | Tiliaceae     | BLD, AD | MP | Mi | Trop         |
| <i>Juglans Regia</i>           | Linn.                     | Jure | Ghwaz     | Juglandaceae  | BLD, AD | MP | Me | IT, ES       |
| <i>Mellia azedarach</i>        | Linn.                     | Meaz | Shanday   | Meliaceae     | BLD, AD | MP | Mi | M            |
| <i>Monothea buxifolia</i>      | (Falc.)                   | Mobu | Gurguri   | Sapotaceae    | BLE, AD | MP | Mi | Trop         |
| <i>Morus alba</i>              | Linn.                     | Moal | Toor Toot | Moraceae      | BLD, AD | MP | Me | IT, Cos      |
| <i>Olea ferruginea</i>         | Royle ex Aitch.           | Olfe | Khuna     | Oleacea       | BLE, AD | MP | Mi | IT, M        |
| <i>Phoenix dactylifera</i>     | Linn.                     | Phda | Kajoorra  | Arecaceae     | BLE, AM | MP | Me | SA, IT       |
| <i>Pinus gerardiana</i>        | Wall. Ex Lamb             | Pige | Chalghoza | Pinaceae      | CE, GM  | MP | L  | ES           |
| <i>Pinus roxburghii</i>        | Sargent                   | Piro | Nakhtar   | Pinaceae      | CE, GM  | MP | L  | ES           |
| <i>Populus nigra</i>           | Linn.                     | Poni | Sperdat   | Salicaceae    | BLD, AD | MP | Me | IT, ES       |
| <i>Prunus armeniaca</i>        | Linn.                     | Prar | Khobanay  | Rosaceae      | BLD, AD | MP | Na | IT, ES       |
| <i>Punica granatum</i>         | Linn.                     | Pugr | Anngorre  | Lythraceae    | BLD, AD | MP | Na | SU, EA       |
| <i>Quercus baloot</i>          | Griffith.                 | Quba | Serray    | Fagaceae      | BLE, AD | MP | Mi | ES, Trop     |
| <i>Salvadora oleoides</i>      | Dene.                     | Saol | Paloo     | Salvadoraceae | BLD, AD | NP | Na | CA,IT        |
| <i>Tamarax aphylla</i>         | (L.) H Karst.             | Taap | Ghaz      | Tamaricaceae  | CE, AD  | MP | L  | SU, IT, CA   |
| <i>Zanthoxylum armatum</i>     | DC.                       | Zaar | Dambara   | Rutaceae      | BLD, AD | NP | Mi | M, PLU       |
| <i>Ziziphus mauritiana</i>     | Lam.                      | Zima | Bera      | Rhamnaceae    | BLE, AD | MP | Na | SA, SU, SS   |

AC = Authority citation, CU = Code used, LN = Local name, TT = Tree type, LF = Life form, LS = Leaf spectra, CH = Chorotypes, BLD = Broad leaved deciduous, BLE = Broad leaved evergreen, AD = Angiospermic dicot, AM = Angiospermic monocot, CE = Conifer evergreen, GM = Gymnosperm, MP = Megaphanerophyte, NP = Nanophanerophyte, L = Leptophyllous, Mi = Microphyllous, Me = Mesophyllous, Ap = Apophyllous, Na = Nanophyllous, SU = Sudno Zambezian, SS = Saharo Sindian, IT = Irano Turanian, CA Central Asian, EA = East Asian , ITL = Italian, SA = Saharo Arabian, PLU = Pluriregional , IGB = indo Gangetic Basin, ES = Euro siberian, M = Medeterranean, Trop = Tropical, Cos = Cosmopoliton.

**Table S2.** Summary of families, tree type, life form, leaf spectra and chorologies of the documented tree species.

| <b>Families</b>                               | <b>Ge</b>      | <b>Spp</b>        | <b>CCS (%)</b> | <b>Families</b>     | <b>Ge</b>      | <b>Spp</b>        | <b>CCS (%)</b> |
|-----------------------------------------------|----------------|-------------------|----------------|---------------------|----------------|-------------------|----------------|
| Arecaceae                                     | 217            | 2500              | 3.70           | Pinaceae            | 11             | 220               | 7.41           |
| Capparidaceae                                 | 33             | 70                | 3.70           | Rhamnaceae          | 55             | 950               | 3.70           |
| Fagaceae                                      | 8              | 927               | 3.70           | Rosaceae            | 91             | 4824              | 3.70           |
| Juglandaceae                                  | 6              | 60                | 3.70           | Rutaceae            | 16             | 2070              | 3.70           |
| Lythraceae                                    | 32             | 620               | 3.70           | Salicaceae          | 55             | 1000              | 3.70           |
| Meliaceae                                     | 51             | 575               | 3.70           | Sapotaceae          | 65             | 800               | 3.70           |
| Mimosaceae                                    | 56             | 2800              | 11.11          | Salvadoraceae       | 3              | 113.70            | 3.70           |
| Moraceae                                      | 38             | 1100              | 11.11          | Simaroubaceae       | 32             | 170               | 3.70           |
| Myrtaceae                                     | 132            | 5950              | 3.70           | Tamaricaceae        | 4              | 78                | 3.70           |
| Oleaceae                                      | 26             | 615               | 3.70           | Tiliaceae           | 50             | 450               | 3.70           |
| Papilionaceae                                 | 400            | 9000              | 3.70           | Ulmaceae            | 7              | 45                | 3.70           |
| <b>Chorologies</b>                            |                |                   |                |                     |                |                   |                |
| <b>Chorotypes</b>                             | <b>CCS (%)</b> | <b>Chorotypes</b> | <b>CCS (%)</b> | <b>Chorotypes</b>   | <b>CCS (%)</b> | <b>Chorotypes</b> | <b>CCS (%)</b> |
| SU                                            | 11.54          | EA                | 5.77           | GR                  | 1.92           | M                 | 5.77           |
| SS                                            | 5.77           | ES                | 15.38          | SA                  | 5.77           | Cos               | 1.92           |
| IT                                            | 23.08          | Trop              | 7.69           | PLU                 | 5.77           | CA                | 3.85           |
| Cir                                           | 1.92           | ITL               | 1.92           | IGB                 | 1.92           |                   |                |
| <b>Tree Types, Life form and Leaf spectra</b> |                |                   |                |                     |                |                   |                |
| <b>Tree type</b>                              | <b>CCS (%)</b> | <b>Life form</b>  | <b>CCS (%)</b> | <b>Leaf Spectra</b> | <b>CCS (%)</b> |                   |                |
| BLD                                           | 59.26          | MP                | 88.89          | L                   | 22.22          |                   |                |
| BLE                                           | 29.63          | NP                | 11.11          | Mi                  | 33.33          |                   |                |
| CE                                            | 11.11          | ---               | ---            | Me                  | 25.93          |                   |                |
| AD                                            | 88.89          | ---               | ---            | AP                  | 3.70           |                   |                |
| AM                                            | 3.70           | ---               | ---            | Na                  | 14.81          |                   |                |
| GM                                            | 7.41           | ---               | ---            | ---                 | ---            |                   |                |

Ge = Genera, Spp = Species number, CCS = Contribution in current study.

**Table S3.** Correlation and biplot scores of CCA and RDA showing the result of sites-environment of 44 *Monothea* vegetation sites.

| Variables                       | Correlations* |        |        | BIPLOT SCORES |        |        |
|---------------------------------|---------------|--------|--------|---------------|--------|--------|
|                                 | Axis 1        | Axis 2 | Axis 3 | Axis 1        | Axis 2 | Axis 3 |
| Latitude                        | -0.36         | -0.247 | -0.218 | -0.78         | -0.40  | -0.33  |
| Longitude                       | -0.269        | -0.09  | -0.265 | -0.58         | -0.14  | -0.40  |
| Elevation                       | 0.481         | -0.297 | 0.368  | 0.087         | -0.48  | 0.567  |
| Slope                           | 0.301         | -0.336 | -0.004 | 0.66          | -0.55  | -0.01  |
| Aspect°                         | 0.203         | -0.175 | 0.06   | 0.444         | -0.28  | 0.092  |
| Clay                            | 0.076         | -0.527 | 0.086  | 0.166         | -0.86  | 0.132  |
| Silt                            | -0.246        | -0.241 | -0.206 | -0.53         | -0.39  | -0.31  |
| Sand                            | 0.227         | 0.393  | 0.183  | 0.496         | 0.648  | 0.281  |
| Texture                         | 0.342         | 0.447  | -0.134 | 0.749         | 0.736  | -0.20  |
| PH                              | 0.183         | 0.131  | -0.249 | 0.4           | 0.215  | -0.384 |
| Organic matter (%)              | 0.116         | -0.132 | 0.41   | 0.254         | -0.21  | 0.632  |
| Lime (%)                        | -0.139        | -0.081 | 0.621  | -0.30         | -0.133 | 0.957  |
| Nitrogen (%)                    | 0.092         | -0.136 | 0.432  | 0.2           | -0.224 | 0.666  |
| Phosphorus (mg/kg)              | 0.395         | -0.063 | -0.157 | 0.865         | -0.104 | -0.241 |
| Potassium (mg/kg)               | 0.085         | 0.355  | 0.124  | 0.185         | 0.585  | 0.191  |
| Field capacity                  | -0.127        | -0.125 | -0.105 | -0.27         | -0.205 | -0.161 |
| Bulk density (g/cm)             | 0.142         | -0.015 | 0.025  | 0.31          | -0.025 | 0.039  |
| Available water (%)             | -0.175        | -0.253 | -0.22  | -0.38         | -0.416 | -0.338 |
| Electrical conductivity (µs/cm) | 0.198         | -0.341 | 0.136  | 0.433         | -0.562 | 0.21   |
| Total dissolve solutes          | 0.198         | -0.341 | 0.136  | 0.434         | -0.562 | 0.21   |

, OM= Organic matter, N= Nitrogen, P = Phosphorous, K = Pottasium, FC= Field capacity, BD = Bulk density, AW = Available water, Ec = Electrical conductivity, TDS = Total dissolve solutes.

Note: \* Correlations are "intra-set correlations" of ter Braak (1986)

**Table S4.** Structural attributes of 27 tree species distributed in four communities. Means values were computed following Analysis of Variance for comparison.

|             | Mono-Acacia      |                      | Mono-Olea            |                      | Mono-Eugl        |                       | Mono                   |                       | P    |       |
|-------------|------------------|----------------------|----------------------|----------------------|------------------|-----------------------|------------------------|-----------------------|------|-------|
|             | D/h              | BA/h                 | D/h                  | BA/h                 | D/h              | BA/h                  | D/h                    | BA/h                  | D/h  | BA/h  |
| <b>Mobu</b> | 258.89±10        | 45.87±5 <sup>a</sup> | 259.26±10            | 32.98±5 <sup>b</sup> | 241.97±26        | 62.3±8.2 <sup>c</sup> | 257.15±13              | 35.7±4.7 <sup>b</sup> | 0.88 | 0.01  |
| <b>Eugl</b> | 8.15±4           | 5.1±3                | 0±0                  | 0±0                  | 0.14±0.1         | 0.14±0.1              | 0.63±0.6               | 0.08±0.08             | 0.07 | 0.16  |
| <b>Quba</b> | 10±5.3           | 2.1±1.1              | 0±0                  | 0±0                  | 0.294±0.3        | 0.29±0.3              | 0±0                    | 0±0                   | 0.03 | 0.05  |
| <b>Ceeu</b> | 2.22±1.6         | 0.3±0.21             | 6.67±5.1             | 0.62±0.5             | 0.20±0.2         | 0.2±0.2               | 2.86±2.3               | 0.2±0.2               | 0.35 | 0.74  |
| <b>Aial</b> | 5.93±4.5         | 0.35±1 <sup>a</sup>  | 0±0                  | 0±0 <sup>a</sup>     | 5.35±2.3         | 1.8±1.8 <sup>a</sup>  | 2.54±1.9               | 0.2±0.2 <sup>b</sup>  | 0.59 | 0.018 |
| <b>Moal</b> | 1.11±0.79        | 0.79±0.6             | 0±0                  | 0±0                  | 0.65±0.4         | 0.35±0.35             | 0.95±0.9               | 0.6±0.6               | 0.84 | 0.81  |
| <b>Fipa</b> | 1.48±0.63        | 0.63±0.4             | 1.48±1.48            | 0.2±0.2              | 0±0              | 0±0                   | 3.49±2                 | 0.19±0.12             | 0.29 | 0.24  |
| <b>Olfe</b> | 5.55±2.9         | 1.64±0.8             | 8.89±6.6             | 1.14±0.9             | 8.35±4.6         | 11.9±10.5             | 20.6±11                | 2.7±1.3               | 0.48 | 0.51  |
| <b>Meaz</b> | 0.37±0.37        | 0.08±0.1             | 1.48±1.48            | 0.32±0.3             | 1.29±0.8         | 0.58±0.3              | 0±0                    | 0±0                   | 0.29 | 0.14  |
| <b>Brpa</b> | 0.37±0.37        | 0.03±0.1             | 0±0                  | 0±0                  | 0.14±0.14        | 0.14±0.14             | 0±0                    | 0±0                   | 0.57 | 0.52  |
| <b>Piro</b> | 1.85±1.85        | 0.64±0.6             | 0±0                  | 0±0                  | 1.1±0.75         | 1.1±0.75              | 4.8±5                  | 0.5±0.5               | 0.76 | 0.74  |
| <b>Dasi</b> | 0±0              | 0±0                  | 7.4±5.2              | 2.5±1.6              | 0.53±0.53        | 0.53±0.53             | 0.32±0.3               | 0.02±0.02             | 0.01 | 0.09  |
| <b>Zaar</b> | 0±0              | 0±0                  | 0±0                  | 0±0                  | 0.07±0.07        | 0.07±0.07             | 0.6±0.6                | 0.04±0.04             | 0.59 | 0.67  |
| <b>Pige</b> | 0±0              | 0±0                  | 0±0                  | 0±0                  | 0.4±0.4          | 0.4±0.4               | 0±0                    | 0±0                   | 0.45 | 0.45  |
| <b>Acmo</b> | 11.11±6.12       | 3.6±1.97             | 5.9±4.3              | 2.2±1.5              | 30.92±15         | 12.88±6.1             | 17.78±7                | 3.1±1.3               | 0.44 | 0.143 |
| <b>Pugr</b> | 6.67±6.67        | 0.69±0.7             | 8.89±8.89            | 0.2±0.2              | 0±0              | 0±0                   | 0±0                    | 0±0                   | 0.41 | 0.49  |
| <b>Prar</b> | 0.74±0.74        | 0.39±0.4             | 0±0                  | 0±0                  | 0±0              | 0±0                   | 1.27±1.3               | 0.05±0.05             | 0.70 | 0.51  |
| <b>Acni</b> | 1.11±1.11        | 0.13±0.2             | 0±0                  | 0±0                  | 1.85±1.3         | 0.2±0.12              | 0±0                    | 0±0                   | 0.42 | 0.48  |
| <b>Grop</b> | 0±0              | 0±0                  | 3.7±3.7              | 0.41±0.4             | 0±0              | 0±0                   | 2.54±2.                | 0.33±0.33             | 0.49 | 0.53  |
| <b>Poni</b> | 0±0              | 0±0                  | 0±0                  | 0±0                  | 1.1±1.1          | 0.08±0.08             | 0±0                    | 0±0                   | 0.44 | 0.45  |
| <b>Zimo</b> | 4.81±3.01        | 3.2±3.2              | 0±0                  | 0±0                  | 1.85±1.8         | 0.39±0.39             | 1.3±1                  | 0.26±0.2              | 0.44 | 0.19  |
| <b>Saol</b> | 2.2±2.2          | 0.96±0.9             | 0±0                  | 0±0                  | 0±0              | 0±0                   | 0±0                    | 0±0                   | 0.45 | 0.45  |
| <b>Alle</b> | 0±0 <sup>a</sup> | 0±0 <sup>a</sup>     | 2.2±1.5 <sup>b</sup> | 0.69±1 <sup>b</sup>  | 0±0 <sup>a</sup> | 0±0 <sup>a</sup>      | 0.32±0.32 <sup>b</sup> | 0.1±0.1 <sup>a</sup>  | 0.02 | 0.020 |
| <b>Cade</b> | 0±0              | 0±0                  | 0±0                  | 0±0                  | 0±0              | 0±0                   | 3.17±1.9               | 0.19±0.12             | 0.15 | 0.184 |
| <b>Taap</b> | 0±0              | 0±0                  | 0±0                  | 0±0                  | 0±0              | 0±0                   | 2.8±2.06               | 0.6±0.4               | 0.27 | 0.23  |
| <b>Phda</b> | 0±0              | 0±0                  | 0±0                  | 0±0                  | 0±0              | 0±0                   | 0.32±0.32              | 0.01±0.01             | 0.55 | 0.558 |
| <b>Jure</b> | 1.11±1.11        | 0.13±0.1             | 0±0                  | 0±0                  | 0±0              | 0±0                   | 1.26±0.98              | 0.1±0.1               | 0.70 | 0.71  |

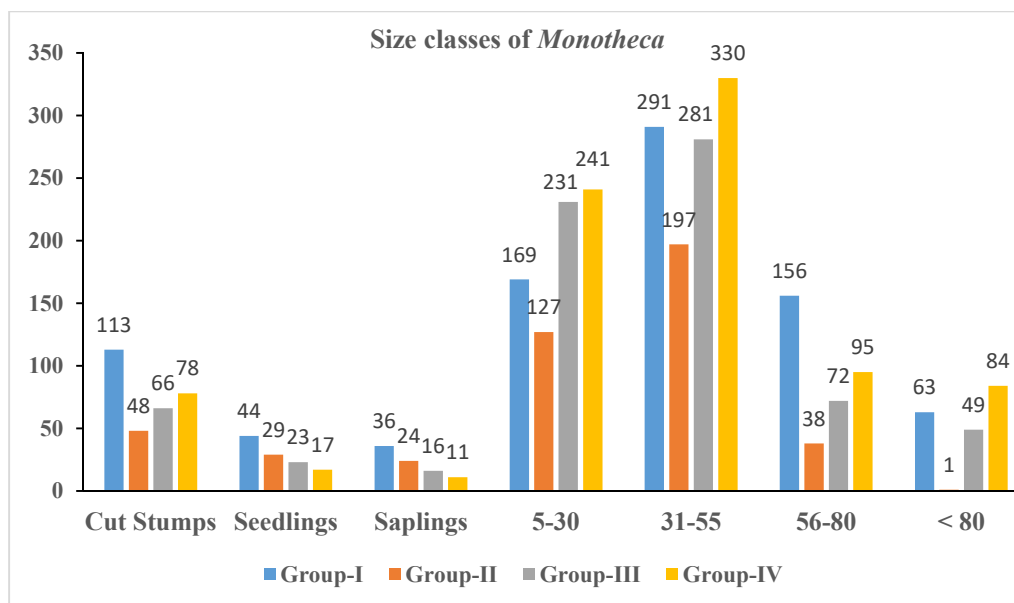

**Figure S1.** Diameter class distribution of seedling (> 3cm), sapling (3-5 cm), small trees (5-30), medium trees (30-55 cm), large trees (55- 80 cm) and mature trees (> 80 cm) of *Monothea* in Pakistan.

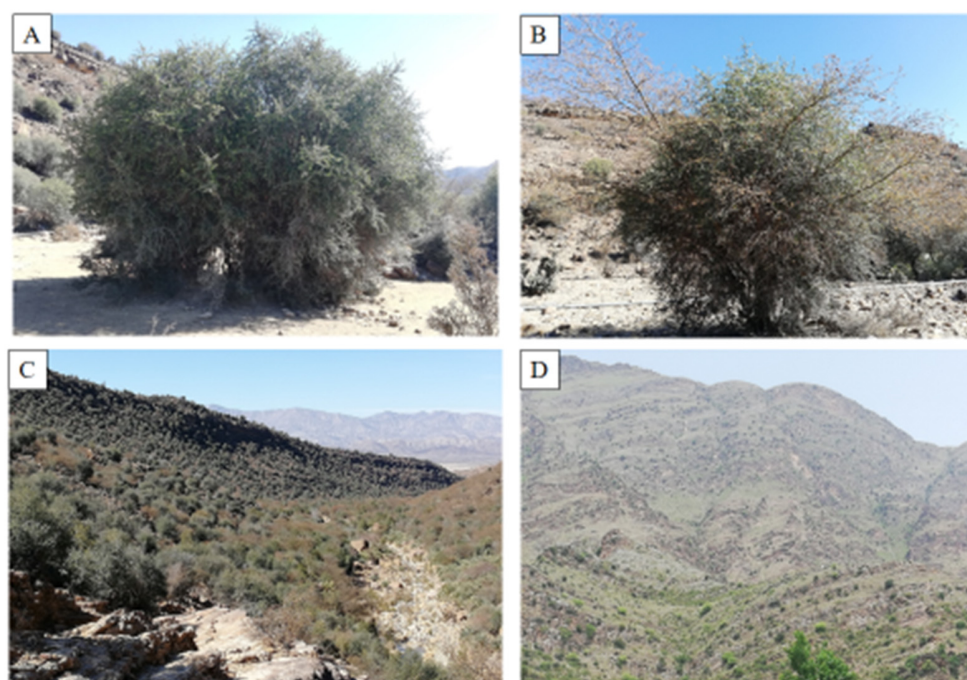

**Figure S2.** Representatives from (A) *Mono-Olea*, (B) *Mono-Acacia*, (C) *Mono-Olea-Acacia* mixed forest, and (D) scars vegetation of *Monothea*.
